# Supplementary material
Source: publisher site journal article supplement (https://bdj.pensoft.net/article/download/suppl/4729429/)
Supplement: Supplementary file

| <b>Species</b>                        | <b>Authorship</b>           | <b>Dates Collected<br/>Park Co.</b>                  | <b>Dates Collected<br/>Lewis and Clark Co.</b>                         | <b>Dates Collected<br/>Flathead Co.</b> |
|---------------------------------------|-----------------------------|------------------------------------------------------|------------------------------------------------------------------------|-----------------------------------------|
| <b>Colletidae</b>                     |                             |                                                      |                                                                        |                                         |
| <i>Colletes consors consors</i>       | Cresson, 1868               |                                                      | June 2014<br>June 2015                                                 |                                         |
| <i>Colletes fulgidus</i>              | Swenk, 1904                 | July-August 2014<br>July 2015<br>July-August 2016    | July 2013<br>June-August 2014<br>June-August 2015<br>July-August 2016  |                                         |
| <i>Colletes hyalinus hyalinus</i>     | Provancher, 1888            | July-August 2014<br>August 2016                      |                                                                        |                                         |
| <i>Colletes kincaidii</i>             | Cockerell, 1898             | August 2016                                          | July 2013<br>June-August 2014<br>July 2016                             |                                         |
| <i>Colletes lutzi lutzi</i>           | Timberlake, 1943            | July 2014<br>July 2016                               | July-August 2015                                                       |                                         |
| <i>Colletes phaceliae</i>             | Cockerell, 1906             |                                                      | June-July 2013<br>July-August 2014<br>June-July 2015<br>June-July 2016 |                                         |
| <i>Hylaeus (Cephalylaeus) basalis</i> | (Smith, 1853)               | July-August 2014<br>June-July 2015<br>June-July 2016 |                                                                        | July 2014                               |
| <i>Hylaeus (Hylaeus) annulatus</i>    | (Linnaeus, 1758)            | June 2013<br>July-August 2014                        | June 2013<br>July-August 2014                                          | July-August 2014                        |
| <i>Hylaeus (Hylaeus) leptcephalus</i> | (Morawitz, 1871)            |                                                      | July-August 2014<br>July 2015<br>August 2016                           |                                         |
| <i>Hylaeus (Hylaeus) mesillae</i>     | (Cockerell, 1896)           |                                                      | June 2013<br>June 2014                                                 |                                         |
| <i>Hylaeus (Hylaeus) rudbeckiae</i>   | (Cockerell and Casad, 1895) |                                                      | June 2013<br>June-August 2014<br>June-July 2015<br>June 2106           |                                         |

| <b>Species</b>                             | <b>Authorship</b>        | <b>Dates Collected<br/>Park Co.</b>                      | <b>Dates Collected<br/>Lewis and Clark Co.</b>           | <b>Dates Collected<br/>Flathead Co.</b> |
|--------------------------------------------|--------------------------|----------------------------------------------------------|----------------------------------------------------------|-----------------------------------------|
| <i>Hylaeus (Hylaeus) verticalis</i>        | (Cresson, 1869)          | July-August 2014                                         | June 2013<br>July 2014<br>June 2015<br>June 2016         | June-July 2014                          |
| <i>Hylaeus (Paraprosopis) coloradensis</i> | (Cockerell, 1896)        | July-August 2014                                         | July-August 2014<br>June-August 2015<br>July-August 2016 |                                         |
| <i>Hylaeus (Paraprosopis) nevadensis</i>   | (Cockerell, 1896)        |                                                          | July 2015                                                |                                         |
| <i>Hylaeus (Paraprosopis) wootoni</i>      | (Cockerell, 1896)        | July-August 2014<br>June-August 2016                     | July-August 2014<br>June-July 2015<br>August 2016        |                                         |
| <i>Hylaeus (Prosopis) episcopalis</i>      | (Cockerell, 1896)        | August 2014<br>August 2015                               | July 2014                                                |                                         |
| <i>Hylaeus (Prosopis) modestus</i>         | Say, 1837                | July-August 2014<br>July-August 2015<br>June-August 2016 | July 2014<br>June 2016                                   | July 2013<br>July 2014                  |
| <b>Andrenidae</b>                          |                          |                                                          |                                                          |                                         |
| <i>Andrena (Andrena) milwaukeensis</i>     | Graenicher, 1903         | July 2015                                                | June 2015                                                |                                         |
| <i>Andrena (Andrena) saccata</i>           | Viereck, 1904            | July 2013<br>July 2014<br>June-July 2015<br>June 2016    |                                                          |                                         |
| <i>Andrena (Andrena) thaspia</i>           | Graenicher, 1903         | July-August 2014<br>July 2015                            | June 2013<br>June 2014<br>June 2015                      | July 2014                               |
| <i>Andrena (Andrena) topazana</i>          | Cockerell, 1906          | June-July 2014<br>June 2015<br>June 2016                 |                                                          |                                         |
| <i>Andrena (Andrena) sp.F1</i>             |                          |                                                          | June 2016                                                |                                         |
| <i>Andrena (Cnemidandrena) surda</i>       | Cockerell, 1910          | July 2014                                                |                                                          |                                         |
| <i>Andrena (Diandrena) evoluta</i>         | Linsley & MacSwain, 1961 |                                                          | June 2015                                                |                                         |

| <b>Species</b>                              | <b>Authorship</b>          | <b>Dates Collected<br/>Park Co.</b> | <b>Dates Collected<br/>Lewis and Clark Co.</b>             | <b>Dates Collected<br/>Flathead Co.</b> |
|---------------------------------------------|----------------------------|-------------------------------------|------------------------------------------------------------|-----------------------------------------|
| <i>Andrena (Euandrena) lawrencei</i>        | Viereck, & Cockerell, 1914 |                                     | June 2013<br>May-June 2014<br>June 2015<br>May-June 2016   |                                         |
| <i>Andrena (Euandrena) nigrocaerulea</i>    | Cockerell, 1897            | June 2016                           | June 2014                                                  |                                         |
| <i>Andrena (Geissandrena) trevoris</i>      | Cockerell, 1897            |                                     | June 2015                                                  |                                         |
| <i>Andrena (Melandrena) nivalis</i>         | Smith, 1853                |                                     | June 2013<br>June-July 2014<br>June 2015<br>July 2016      | July 2014                               |
| <i>Andrena (Melandrena) pertristis</i>      | Cockerell, 1905            |                                     | June 2015                                                  |                                         |
| <i>Andrena (Melandrena) transnigra</i>      | Viereck, 1904              |                                     | May 2014                                                   |                                         |
| <i>Andrena (Melandrena) vicina</i>          | Smith, 1853                |                                     | June 2015                                                  |                                         |
| <i>Andrena (Micrandrena) melanochoa</i>     | Cockerell, 1898            | July 2015                           | June 2015                                                  |                                         |
| <i>Andrena (Micrandrena) microchlora</i>    | Cockerell, 1922            |                                     | May 2014                                                   |                                         |
| <i>Andrena (Plastandrena) crataegi</i>      | Robertson, 1893            | July 2014<br>June-July 2015         | June 2013<br>May-June 2014<br>June 2015<br>May-June 2016   |                                         |
| <i>Andrena (Plastandrena) prunorum</i>      | Cockerell, 1896            | June 2015                           | June 2013<br>June-July 2014<br>June 2015<br>June-July 2016 |                                         |
| <i>Andrena (Scaphandrena) aff. shoshoni</i> | Ribble, 1974               |                                     | May 2014                                                   |                                         |
| <i>Andrena (Scaphandrena) scurra</i>        | Viereck, 1904              |                                     | June 2015<br>June 2016                                     |                                         |
| <i>Andrena (Scaphandrena) walleyi</i>       | Cockerell, 1932            |                                     | May 2014<br>May-June 2016                                  |                                         |
| <i>Andrena (Thysandrena) candida</i>        | Smith, 1879                | July 2014                           |                                                            | June 2013                               |
| <i>Andrena (Thysandrena) knuthiana</i>      | Cockerell, 1901            | July 2014                           |                                                            | July 2014                               |
| <i>Andrena (Thysandrena) medionitens</i>    | Cockerell, 1902            | June 2016                           | July 2014<br>June 2015<br>June 2016                        |                                         |

| Species                                    | Authorship        | Dates Collected<br>Park Co.                                         | Dates Collected<br>Lewis and Clark Co.                            | Dates Collected<br>Flathead Co. |
|--------------------------------------------|-------------------|---------------------------------------------------------------------|-------------------------------------------------------------------|---------------------------------|
| <i>Andrena (Thysandrena) vierecki</i>      | Cockerell, 1904   | July 2014                                                           |                                                                   |                                 |
| <i>Andrena (Trachandrena) amphibola</i>    | (Viereck, 1904)   | June-July 2013<br>July 2014<br>June 2015                            | June 2013<br>June-August 2014<br>June-July 2015<br>June-July 2016 |                                 |
| <i>Andrena (Trachandrena) cleodora</i>     | (Viereck, 1904)   |                                                                     | July 2014                                                         | June-July 2013<br>July 2014     |
| <i>Andrena (Trachandrena) cupreotincta</i> | Cockerell, 1901   |                                                                     | June 2015                                                         |                                 |
| <i>Andrena (Trachandrena) miranda</i>      | Smith, 1879       | July 2013<br>July-August 2014<br>June-July 2015<br>June-August 2016 | June-July 2014<br>June 2016                                       |                                 |
| <i>Andrena (Trachandrena) salicifloris</i> | Cockerell, 1897   | June 2015                                                           | July 2014                                                         |                                 |
| <i>Andrena (Trachandrena) sigmundi</i>     | Cockerell, 1902   |                                                                     | June 2015                                                         |                                 |
| <i>Andrena</i> sp.F7                       |                   | July 2015                                                           | June 2015                                                         |                                 |
| <i>Andrena</i> sp.F8                       |                   |                                                                     | May 2016                                                          |                                 |
| <i>Andrena</i> sp.F11                      |                   |                                                                     | June 2016                                                         |                                 |
| <i>Andrena</i> sp.F12                      |                   |                                                                     | May 2016                                                          |                                 |
| <i>Andrena</i> sp.F13                      |                   |                                                                     | June 2016                                                         |                                 |
| <i>Andrena</i> sp.F14                      |                   |                                                                     | May 2016                                                          |                                 |
| <i>Andrena</i> sp.F15                      |                   | June 2016                                                           |                                                                   |                                 |
| <i>Andrena</i> sp.F16                      |                   |                                                                     | June 2016                                                         |                                 |
| <i>Andrena</i> sp.F17                      |                   |                                                                     | June 2016                                                         |                                 |
| <i>Panurginus atriceps</i>                 | (Cresson, 1878)   | July 2014                                                           | June 2013<br>June 2014<br>June 2015                               | June-July 2014                  |
| <i>Panurginus</i> sp.F1                    |                   | June 2015                                                           |                                                                   |                                 |
| <i>Panurginus</i> sp.1                     |                   | July 2014<br>June 2015                                              | June 2015                                                         |                                 |
| <i>Protandrena (Pterosarus) innuptus</i>   | (Cockerell, 1896) |                                                                     | July 2013                                                         |                                 |

| Species                                    | Authorship        | Dates Collected<br>Park Co.                                  | Dates Collected<br>Lewis and Clark Co.                                    | Dates Collected<br>Flathead Co.                 |
|--------------------------------------------|-------------------|--------------------------------------------------------------|---------------------------------------------------------------------------|-------------------------------------------------|
| Halictidae                                 |                   |                                                              |                                                                           |                                                 |
| <i>Agapostemon (Agapostemon) texanus</i>   | Cresson, 1872     |                                                              | July 2013<br>May-August 2014<br>June 2015<br>June-August 2016             |                                                 |
| <i>Agapostemon (Agapostemon) virescens</i> | (Fabricius, 1775) |                                                              | June 2013<br>June-August 2014<br>June-July 2015<br>June-July 2016         |                                                 |
| <i>Dufourea dilatipes</i>                  | Bohart, 1948      |                                                              |                                                                           | June 2015                                       |
| <i>Dufourea maura</i>                      | (Cresson, 1878)   | July 2013<br>July-August 2014<br>June-July 2015<br>July 2016 | June 2013<br>June-July 2014<br>June 2015<br>June 2016                     | July 2013                                       |
| <i>Dufourea trochantera</i>                | Bohart, 1948      |                                                              | June 2013<br>June-July 2014<br>June 2015                                  |                                                 |
| <i>Halictus (Nealictus) farinosus</i>      | Smith, 1853       | August 2016                                                  | August 2014<br>August 2016                                                |                                                 |
| <i>Halictus (Odontalictus) ligatus</i>     | Say, 1837         |                                                              | June-July 2013<br>May-August 2014<br>June-August 2015<br>June-August 2016 |                                                 |
| <i>Halictus (Protohalictus) rubicundus</i> | (Christ, 1791)    | June-August 2014<br>June-July 2015<br>June 2016              | June 2013<br>June-August 2014<br>June-July 2015<br>July 2016              | June 2013<br>June-August 2014<br>June-July 2015 |
| <i>Halictus (Seladonia) confusus</i>       | Smith, 1853       | July-August 2014<br>June 2015<br>June 2016                   | June 2013<br>May-August 2014<br>June-August 2015<br>June-July 2016        | July 2014                                       |

| <b>Species</b>                                | <b>Authorship</b> | <b>Dates Collected<br/>Park Co.</b>                     | <b>Dates Collected<br/>Lewis and Clark Co.</b>                      | <b>Dates Collected<br/>Flathead Co.</b>              |
|-----------------------------------------------|-------------------|---------------------------------------------------------|---------------------------------------------------------------------|------------------------------------------------------|
| <i>Halictus (Seladonia) tripartitus</i>       | Cockerell, 1895   |                                                         | June 2013<br>May-August 2014<br>June-August 2015<br>June-July 2016  |                                                      |
| <i>Lasioglossum (Dialictus) abundipunctum</i> | Gibbs, 2010       |                                                         | July 2014<br>June 2015                                              |                                                      |
| <i>Lasioglossum (Dialictus) aff.caducum</i>   | (Sandhouse, 1924) |                                                         | May-August 2014<br>June-August 2015                                 |                                                      |
| <i>Lasioglossum (Dialictus) aff.nevadense</i> | (Crawford, 1907)  |                                                         | July 2014<br>June 2015<br>August 2016                               |                                                      |
| <i>Lasioglossum (Dialictus) albipenne</i>     | (Robertson, 1890) | July-August 2014<br>June 2016                           | June 2013<br>May-August 2014<br>June-July 2015<br>June-August 2016  |                                                      |
| <i>Lasioglossum (Dialictus) brunneiventre</i> | (Crawford, 1907)  |                                                         | July 2016                                                           |                                                      |
| <i>Lasioglossum (Dialictus) ebmerellum</i>    | Gibbs, 2010       |                                                         | July 2013<br>June-August 2014<br>June-August 2015<br>June-July 2016 |                                                      |
| <i>Lasioglossum (Dialictus) ephialtum</i>     | Gibbs, 2010       | June 2015                                               |                                                                     | July 2013<br>July 2014                               |
| <i>Lasioglossum (Dialictus) hudsoniellum</i>  | (Cockerell, 1919) |                                                         | July 2014                                                           |                                                      |
| <i>Lasioglossum (Dialictus) hyalinum</i>      | Crawford, 1907    |                                                         | July 2014<br>June 2015                                              |                                                      |
| <i>Lasioglossum (Dialictus) marinense</i>     | (Michener, 1936)  | June 2013<br>June-August 2014<br>June 2015<br>July 2016 | May-July 2014<br>June-July 2015<br>June July 2016                   | June-July 2013<br>June-August 2014<br>June-July 2015 |
| <i>Lasioglossum (Dialictus) nevadense</i>     | (Crawford, 1907)  |                                                         | July-August 2016                                                    |                                                      |

| <b>Species</b>                                   | <b>Authorship</b>  | <b>Dates Collected<br/>Park Co.</b>                       | <b>Dates Collected<br/>Lewis and Clark Co.</b>                  | <b>Dates Collected<br/>Flathead Co.</b>    |
|--------------------------------------------------|--------------------|-----------------------------------------------------------|-----------------------------------------------------------------|--------------------------------------------|
| <i>Lasioglossum (Dialictus) nigroviride</i>      | (Graenicher, 1911) | June 2013<br>June-August 2014<br>June 2015<br>August 2016 | June 2015                                                       | July 2013<br>June-August 2014<br>July 2015 |
| <i>Lasioglossum (Dialictus) aff.lilliputense</i> | Gibbs, 2010        |                                                           | July 2015                                                       |                                            |
| <i>Lasioglossum (Dialictus) aff.occidentale</i>  | (Crawford, 1902)   |                                                           | June-July 2013<br>June-August 2014<br>June-July 2015            |                                            |
| <i>Lasioglossum (Dialictus) aff.pavoninum</i>    | (Ellis, 1913)      |                                                           | June 2013<br>June-July 2014                                     |                                            |
| <i>Lasioglossum (Dialictus) obnubilum</i>        | (Sandhouse, 1924)  | August 2014                                               | June-July 2014<br>June 2015                                     |                                            |
| <i>Lasioglossum (Dialictus) occidentale</i>      | (Crawford, 1902)   |                                                           | June-July 2013<br>June-August 2014<br>June-July 2015            |                                            |
| <i>Lasioglossum (Dialictus) planatum</i>         | (Lovell, 1905)     | June 2016                                                 |                                                                 |                                            |
| <i>Lasioglossum (Dialictus) pruinsum</i>         | (Robertson, 1892)  |                                                           | May-August 2014<br>June-July 2015<br>July 2016                  |                                            |
| <i>Lasioglossum (Dialictus) ruidosense</i>       | (Cockerell, 1897)  | July 2014                                                 | May-June 2014<br>June 2015<br>June 2016                         |                                            |
| <i>Lasioglossum (Dialictus) sedi</i>             | (Sandhouse, 1924)  | July 2014                                                 | June 2013<br>June-July 2014<br>June-July 2015<br>June-July 2016 |                                            |
| <i>Lasioglossum (Dialictus) semicaeruleum</i>    | (Cockerell, 1895)  |                                                           | May-July 2014<br>June 2016                                      |                                            |
| <i>Lasioglossum (Dialictus) sp.F17</i>           |                    | June-July 2014                                            |                                                                 |                                            |
| <i>Lasioglossum (Dialictus) sp.F27</i>           |                    | July 2014                                                 | July 2015                                                       | June 2015                                  |
| <i>Lasioglossum (Dialictus) succinipenne</i>     | (Ellis, 1913)      |                                                           | May-August 2014<br>June-July 2015<br>June-August 2016           |                                            |

| <b>Species</b>                                  | <b>Authorship</b> | <b>Dates Collected<br/>Park Co.</b>        | <b>Dates Collected<br/>Lewis and Clark Co.</b>  | <b>Dates Collected<br/>Flathead Co.</b> |
|-------------------------------------------------|-------------------|--------------------------------------------|-------------------------------------------------|-----------------------------------------|
| <i>Lasioglossum (Dialictus) tenax</i>           | (Sandhouse, 1924) | June-August 2014<br>June-July 2015         | May-August 2014<br>June-July 2015               |                                         |
| <i>Lasioglossum (Dialictus) versatum</i>        | (Robertson, 1902) |                                            |                                                 | June 2015                               |
| <i>Lasioglossum (Dialictus) vierecki</i>        | (Crawford, 1904)  |                                            | August 2014                                     |                                         |
| <i>Lasioglossum (Evylaeus) sp.F1</i>            |                   | June-July 2014<br>June 2015                | July 2015                                       | June-July 2014                          |
| <i>Lasioglossum (Evylaeus) sp.F2</i>            |                   | August 2016                                | May-August 2014<br>June 2015<br>May-July 2016   | June 2013<br>July 2015                  |
| <i>Lasioglossum (Evylaeus) sp.F3</i>            |                   | June 2013<br>June-August 2014<br>July 2015 | June 2015                                       |                                         |
| <i>Lasioglossum (Evylaeus) sp.F4</i>            |                   |                                            |                                                 | July 2014                               |
| <i>Lasioglossum (Evylaeus) sp.F5</i>            |                   | June 2013<br>June-August 2014<br>June 2016 | June 2013<br>May-June 2014<br>June 2015         | June 2013<br>June-July 2013             |
| <i>Lasioglossum (Evylaeus) sp.F6</i>            |                   | June 2014<br>June-August 2016              | June 2013<br>June 2016                          | July 2014                               |
| <i>Lasioglossum (Evylaeus) sp.F7</i>            |                   |                                            | July 2014                                       |                                         |
| <i>Lasioglossum (Evylaeus) sp.F8</i>            |                   |                                            | August 2014                                     |                                         |
| <i>Lasioglossum (Evylaeus) sp.F9</i>            |                   |                                            | May 2016                                        |                                         |
| <i>Lasioglossum (Evylaeus) sp.F28</i>           |                   | August 2014                                | June-July 2014<br>June 2015                     |                                         |
| <i>Lasioglossum (Lasioglossum) anhypops</i>     | McGinley, 1986    | June-August 2014                           |                                                 | June 2013<br>June 2014                  |
| <i>Lasioglossum (Lasioglossum) egregium</i>     | (Vachal, 1904)    | August 2014                                | June-August 2014<br>June 2015<br>June-July 2016 |                                         |
| <i>Lasioglossum (Lasioglossum) paraforbesii</i> | McGinley, 1986    |                                            | June 2015                                       |                                         |
| <i>Lasioglossum (Lasioglossum) sisymbrii</i>    | (Cockerell, 1895) | August 2014                                | June 2015<br>June-July 2016                     |                                         |
| <i>Lasioglossum (Leuchalictus) leucozonium</i>  | (Schrank, 1781)   |                                            | June 2015                                       |                                         |
| <i>Lasioglossum (Sphecodogastra) aberrans</i>   | (Crawford, 1903)  |                                            | June-July 2014                                  |                                         |



| Species                                                 | Authorship        | Dates Collected<br>Park Co.                | Dates Collected<br>Lewis and Clark Co.                                | Dates Collected<br>Flathead Co. |
|---------------------------------------------------------|-------------------|--------------------------------------------|-----------------------------------------------------------------------|---------------------------------|
| <i>Lasioglossum (Sphecodogastra) lusorium</i>           | (Cresson, 1872)   |                                            | July 2015                                                             |                                 |
| Megachilidae                                            |                   |                                            |                                                                       |                                 |
| <i>Anthidiellum (Loyolanthidium) notatum robertsoni</i> | (Cockerell, 1904) |                                            | August 2014                                                           |                                 |
| <i>Anthidium (Anthidium) atrifrons</i>                  | Cresson, 1868     | July 2014                                  | August 2014                                                           |                                 |
| <i>Anthidium (Anthidium) clypeodentatum</i>             | Swenk, 1914       |                                            | July-August 2014<br>August 2015<br>July 2016                          |                                 |
| <i>Anthidium (Anthidium) formosum</i>                   | Cresson, 1878     |                                            | July 2013<br>July 2014<br>June 2015                                   |                                 |
| <i>Anthidium (Anthidium) mormonum</i>                   | Cresson, 1878     | July 2014                                  | June-July 2013<br>July-August 2014<br>June 2015<br>July 2016          |                                 |
| <i>Anthidium (Anthidium) placitum</i>                   | Cresson, 1879     |                                            | August 2015                                                           |                                 |
| <i>Anthidium (Anthidium) tenuiflorae</i>                | Cockerell, 1907   | August 2016                                | July-August 2014<br>July 2016                                         |                                 |
| <i>Anthidium (Anthidium) utahense</i>                   | Swenk, 1914       |                                            | July 2013<br>June-August 2014<br>June-August 2015<br>June-August 2016 |                                 |
| <i>Ashmeadiella (Ashmeadiella) gillettei</i>            | Titus, 1904       |                                            | June 2015<br>June 2016                                                |                                 |
| <i>Ashmeadiella (Ashmeadiella) buconis</i>              | (Say, 1837)       |                                            | July 2013<br>July-August 2014<br>June-August 2015<br>June-July 2016   |                                 |
| <i>Ashmeadiella (Ashmeadiella) cactorum</i>             | (Cockerell, 1897) | July-August 2014<br>July 2015<br>July 2016 | July 2013<br>July-August 2014<br>June-August 2015<br>June 2016        |                                 |

| <b>Species</b>                                 | <b>Authorship</b>   | <b>Dates Collected<br/>Park Co.</b> | <b>Dates Collected<br/>Lewis and Clark Co.</b>                           | <b>Dates Collected<br/>Flathead Co.</b> |
|------------------------------------------------|---------------------|-------------------------------------|--------------------------------------------------------------------------|-----------------------------------------|
| <i>Ashmeadiella (Ashmeadiella) californica</i> | (Ashmead, 1897)     | July 2014<br>June 2015              | June-July 2013<br>June-August 2014<br>June-August 2015<br>June-July 2016 |                                         |
| <i>Ashmeadiella (Ashmeadiella) meliloti</i>    | (Cockerell, 1897)   |                                     | August 2014<br>June 2016                                                 |                                         |
| <i>Ashmeadiella (Ashmeadiella) pronitens</i>   | (Cockerell, 1906)   | July-August 2014<br>June-July 2016  |                                                                          |                                         |
| <i>Chelostoma (Chelostoma) minutum</i>         | Crawford, 1916      | July 2014                           |                                                                          |                                         |
| <i>Coelioxys (Boreocoelioxys) moesta</i>       | Cresson, 1864       | July-August 2014                    | August 2014                                                              | July 2014                               |
| <i>Coelioxys (Boreocoelioxys) porterae</i>     | Cockerell, 1900     |                                     | July-August 2014                                                         | July 2014                               |
| <i>Coelioxys (Boreocoelioxys) rufitarsis</i>   | Smith, 1854         |                                     | July-August 2014                                                         | July 2014                               |
| <i>Coelioxys (Coelioxys) sodalis</i>           | Cresson, 1878       |                                     | June 2015                                                                |                                         |
| <i>Coelioxys (Cyrtocoelioxys) modesta</i>      | Smith, 1854         |                                     | August 2015                                                              |                                         |
| <i>Coelioxys (Paracoelioxys) funeraria</i>     | Smith, 1854         |                                     |                                                                          | July 2013<br>June 2015                  |
| <i>Coelioxys (Synocoelioxys) alternata</i>     | Say, 1837           |                                     | July 2013<br>July-August 2014<br>June 2015                               |                                         |
| <i>Dianthidium (Dianthidium) cressonii</i>     | (Dalla Torre, 1896) |                                     | August 2016                                                              |                                         |
| <i>Dianthidium (Dianthidium) subparvum</i>     | Swenk, 1914         |                                     | July 2013<br>July-August 2014<br>June-July 2015<br>July-August 2016      |                                         |
| <i>Dianthidium (Dianthidium) ulkei</i>         | (Cresson, 1878)     |                                     | July 2013<br>July-August 2014<br>July-August 2015<br>July-August 2016    |                                         |
| <i>Dioxys productus</i>                        | (Cresson, 1879)     |                                     | July 2014                                                                |                                         |
| <i>Heriades (Neotrypetes) carinatus</i>        | Cresson, 1864       |                                     | July 2013<br>July-August 2014<br>July-August 2015<br>June-July 2016      | July 2014                               |

| <b>Species</b>                                     | <b>Authorship</b> | <b>Dates Collected<br/>Park Co.</b>                                        | <b>Dates Collected<br/>Lewis and Clark Co.</b>                           | <b>Dates Collected<br/>Flathead Co.</b>  |
|----------------------------------------------------|-------------------|----------------------------------------------------------------------------|--------------------------------------------------------------------------|------------------------------------------|
| <i>Heriades (Neotrypetes) cressoni</i>             | Michener, 1938    | August 2014                                                                | July 2013<br>July-August 2014<br>July-August 2015<br>June-August 2016    |                                          |
| <i>Heriades (Neotrypetes) variolosa</i>            | (Cresson, 1872)   |                                                                            | July 2013<br>July-August 2014<br>July-August 2015                        | July 2013                                |
| <i>Hoplitis (Alcidamea) albifrons argentifrons</i> | (Cresson, 1864)   | July 2013<br>June-August 2014<br>June-July 2015<br>June-August 2016        | June-July 2013<br>June-August 2014<br>June 2015<br>June-July 2016        | July 2013<br>July 2014<br>June-July 2015 |
| <i>Hoplitis (Alcidamea) fulgida fulgida</i>        | (Cresson, 1864)   | June-July 2013<br>July-August 2014<br>June-August 2015<br>June-August 2016 | June 2013<br>June 2014                                                   | July 2013<br>July 2014                   |
| <i>Hoplitis (Alcidamea) grinnelli</i>              | (Cockerell, 1910) |                                                                            | June-July 2014<br>June 2015                                              |                                          |
| <i>Hoplitis (Alcidamea) hypocrita</i>              | (Cockerell, 1906) |                                                                            | June-July 2013<br>May-July 2014<br>June-July 2015<br>June-July 2016      |                                          |
| <i>Hoplitis (Alcidamea) producta</i>               | (Cresson, 1864)   | August 2014<br>June-July 2015                                              | July-August 2014<br>June 2015<br>June 2016                               | July 2013                                |
| <i>Hoplitis (Alcidamea) truncata</i>               | (Cresson, 1878)   |                                                                            | June-July 2013<br>June-August 2014<br>June-August 2015<br>June-July 2016 |                                          |
| <i>Hoplitis (Formicapis) robusta</i>               | (Nylander, 1848)  | July 2014<br>June-July 2016                                                |                                                                          |                                          |
| <i>Megachile (Argyropile) parallela</i>            | Smith, 1853       |                                                                            | July-August 2014<br>July 2015<br>July-August 2016                        |                                          |

| <b>Species</b>                                | <b>Authorship</b> | <b>Dates Collected<br/>Park Co.</b>                                   | <b>Dates Collected<br/>Lewis and Clark Co.</b>                        | <b>Dates Collected<br/>Flathead Co.</b>  |
|-----------------------------------------------|-------------------|-----------------------------------------------------------------------|-----------------------------------------------------------------------|------------------------------------------|
| <i>Megachile (Chelostomoides) campanulae</i>  | (Robertson, 1903) |                                                                       | June-July 2015<br>July 2016                                           |                                          |
| <i>Megachile (Chelostomoides) angelarum</i>   | Cockerell, 1902   | August 2016                                                           | July-August 2014<br>July 2016                                         |                                          |
| <i>Megachile (Eutricharaea) apicalis</i>      | Spinola, 1808     | July 2016                                                             | July 2013<br>July-August 2014<br>June-August 2015<br>June-August 2016 |                                          |
| <i>Megachile (Eutricharaea) rotundata</i>     | (Fabricius, 1793) |                                                                       | July-August 2015                                                      |                                          |
| <i>Megachile (Litomegachile) brevis</i>       | Say, 1837         |                                                                       | July-August 2014<br>June 2015                                         |                                          |
| <i>Megachile (Litomegachile) onobrychidis</i> | Cockerell, 1905   |                                                                       | June-August 2014                                                      |                                          |
| <i>Megachile (Litomegachile) texana</i>       | Cresson, 1878     |                                                                       | July-August 2014                                                      |                                          |
| <i>Megachile (Megachile) lapponica</i>        | Thomson, 1872     | July 2013<br>July-August 2014<br>June-July 2015<br>June-August 2016   | June 2015                                                             | July 2013<br>July 2014<br>June 2015      |
| <i>Megachile (Megachile) montivaga</i>        | Cresson, 1878     | June 2016                                                             | July 2014<br>July-August 2015<br>July 2016                            |                                          |
| <i>Megachile (Megachile) relativa</i>         | Cresson, 1878     | July 2013<br>July-August 2014<br>July-August 2015<br>July-August 2016 | June-August 2014<br>June 2015<br>July-August 2016                     | July 2013<br>July 2014<br>June-July 2015 |
| <i>Megachile (Megachiloides) subnigra</i>     | Cresson, 1879     |                                                                       | June 2015                                                             |                                          |
| <i>Megachile (Megachiloides) wheeleri</i>     | Mitchell, 1927    |                                                                       | August 2014                                                           |                                          |
| <i>Megachile (Sayapis) fidelis</i>            | Cresson, 1878     |                                                                       | July-August 2014<br>July-August 2015<br>July-August 2016              |                                          |
| <i>Megachile (Sayapis) pugnata</i>            | Say, 1837         | July 2013<br>July-August 2014<br>July 2015<br>June-August 2016        | July 2013<br>June-August 2014<br>June-August 2015<br>June-August 2016 | June 2014                                |

| <b>Species</b>                             | <b>Authorship</b>         | <b>Dates Collected<br/>Park Co.</b>                                   | <b>Dates Collected<br/>Lewis and Clark Co.</b>                             | <b>Dates Collected<br/>Flathead Co.</b>    |
|--------------------------------------------|---------------------------|-----------------------------------------------------------------------|----------------------------------------------------------------------------|--------------------------------------------|
| <i>Megachile (Xanthosarus) frigida</i>     | Smith, 1853               | July 2013<br>July-August 2014<br>June-August 2015<br>June-August 2016 | June-July 2013<br>June-August 2014<br>June-August 2015<br>June-August 2016 | July 2013<br>July-August 2014<br>July 2015 |
| <i>Megachile (Xanthosarus) gemula</i>      | Cresson, 1878             | July-August 2014<br>June 2015<br>July 2016                            | June 2013<br>June-July 2014                                                | July 2013<br>July 2014                     |
| <i>Megachile (Xanthosarus) latimanus</i>   | Say, 1823                 |                                                                       | July 2015<br>August 2016                                                   |                                            |
| <i>Megachile (Xanthosarus) melanophaea</i> | Smith, 1853               | July-August 2014<br>June-July 2015<br>June-July 2016                  | June 2013<br>June-July 2014<br>June 2015                                   |                                            |
| <i>Megachile (Xanthosarus) perihirta</i>   | Cockerell, 1898           | July-August 2014<br>July-August 2016                                  | June-July 2013<br>June-August 2014<br>June-August 2015<br>June-August 2016 | July 2014                                  |
| <i>Osmia (Cephalosmia) californica</i>     | Cresson, 1864             |                                                                       | June-July 2013<br>May-June 2014<br>June 2015<br>May-June 2016              |                                            |
| <i>Osmia (Cephalosmia) marginipennis</i>   | Cresson, 1878             |                                                                       | May-June 2014<br>June 2015<br>May 2016                                     |                                            |
| <i>Osmia (Cephalosmia) montana montana</i> | Cresson, 1864             | July 2014<br>June-July 2015<br>June 2016                              | June 2013<br>May-July 2014<br>June 2015<br>May-June 2016                   |                                            |
| <i>Osmia (Cephalosmia) subaustralis</i>    | Cockerell, 1900           | August 2014<br>June-August 2015<br>June 2016                          | June 2016                                                                  |                                            |
| <i>Osmia (Hapsidosmia) iridis</i>          | Cockerell and Titus, 1902 |                                                                       | June 2013<br>May-June 2014<br>June 2015                                    |                                            |

| <b>Species</b>                              | <b>Authorship</b> | <b>Dates Collected<br/>Park Co.</b>                                    | <b>Dates Collected<br/>Lewis and Clark Co.</b>                   | <b>Dates Collected<br/>Flathead Co.</b>  |
|---------------------------------------------|-------------------|------------------------------------------------------------------------|------------------------------------------------------------------|------------------------------------------|
| <i>Osmia (Helicosmia) coloradensis</i>      | Cresson, 1878     | July 2014<br>June-August 2016                                          | June-July 2013<br>May-July 2014<br>June 2015<br>May-July 2016    | June 2013<br>July 2014<br>June 2015      |
| <i>Osmia (Helicosmia) texana</i>            | Cresson, 1872     |                                                                        | July 2013<br>July-August 2014<br>July 2015                       |                                          |
| <i>Osmia (Melanosmia) aff.albolateralis</i> | Cockerell, 1906   |                                                                        | July 2014                                                        |                                          |
| <i>Osmia (Melanosmia) aff.grindeliae</i>    | Cockerell, 1900   |                                                                        | July 2014                                                        |                                          |
| <i>Osmia (Melanosmia) aff.paradisica</i>    | Sandhouse, 1924   | July-August 2014<br>August 2015<br>August 2016                         | July 2014                                                        | July 2014                                |
| <i>Osmia (Melanosmia) aff.pusilla</i>       | Cresson, 1864     | July 2014                                                              |                                                                  |                                          |
| <i>Osmia (Melanosmia) albolateralis</i>     | Cockerell, 1906   | June-July 2013<br>June-August 2014<br>June-July 2015<br>June-July 2016 | June-July 2013<br>May-August 2014<br>June 2015<br>June-July 2016 | July 2013<br>June-July 2014<br>June 2015 |
| <i>Osmia (Melanosmia) atrocyanea</i>        | Cockerell, 1897   | June 2016                                                              | June 2013<br>June-July 2014<br>June 2015<br>June-July 2016       |                                          |
| <i>Osmia (Melanosmia) brevis</i>            | Cresson, 1864     | June 2014<br>June 2015<br>June 2016                                    | June-July 2013<br>May-June 2014<br>June 2015                     |                                          |
| <i>Osmia (Melanosmia) bruneri</i>           | Cockerell, 1897   |                                                                        | June 2013<br>June 2014<br>June 2015<br>June-July 2016            |                                          |
| <i>Osmia (Melanosmia) bucephala</i>         | Cresson, 1864     | July 2013<br>July 2014<br>June-July 2015<br>June 2016                  | June 2013<br>June 2015                                           | July 2013<br>July 2014                   |
| <i>Osmia (Melanosmia) cyanella</i>          | Cockerell, 1897   |                                                                        |                                                                  | July 2014                                |

| <b>Species</b>                                 | <b>Authorship</b>   | <b>Dates Collected<br/>Park Co.</b>               | <b>Dates Collected<br/>Lewis and Clark Co.</b>                     | <b>Dates Collected<br/>Flathead Co.</b> |
|------------------------------------------------|---------------------|---------------------------------------------------|--------------------------------------------------------------------|-----------------------------------------|
| <i>Osmia (Melanosmia) densa</i>                | Cresson, 1864       | July 2013<br>July 2015<br>June 2016               | June-July 2013<br>May-July 2014<br>June 2015<br>May-June 2016      | June-July 2015                          |
| <i>Osmia (Melanosmia) ednae</i>                | Cockerell, 1907     | July 2013<br>June-July 2014                       |                                                                    |                                         |
| <i>Osmia (Melanosmia) grindeliae</i>           | Cockerell, 1910     | July 2014                                         | June-July 2014                                                     | June 2014                               |
| <i>Osmia (Melanosmia) inermis</i>              | (Zetterstedt, 1838) | July 2014<br>June 2015<br>June 2016               | June-July 2014                                                     | July 2014                               |
| <i>Osmia (Melanosmia) integra</i>              | Cresson, 1878       |                                                   | May 2016                                                           |                                         |
| <i>Osmia (Melanosmia) juxta</i>                | Cresson, 1864       | June-August 2014<br>June 2015<br>June-August 2016 | June-July 2013<br>May-July 2014<br>June-July 2015<br>May-July 2016 | July 2013<br>July 2014<br>June 2015     |
| <i>Osmia (Melanosmia) kincaidii</i>            | Cockerell, 1897     |                                                   | June 2013<br>June 2014<br>June 2015                                |                                         |
| <i>Osmia (Melanosmia) longula</i>              | Cresson, 1864       | July 2013                                         | May-July 2014                                                      |                                         |
| <i>Osmia (Melanosmia) malina</i>               | Cockerell, 1909     |                                                   | July 2014                                                          |                                         |
| <i>Osmia (Melanosmia) nigrifrons</i>           | Cresson, 1878       | July-August 2014<br>June 2016                     | June 2013<br>June-July 2014<br>June 2015<br>May 2016               |                                         |
| <i>Osmia (Melanosmia) nigriventris</i>         | (Zetterstedt, 1838) | July 2014<br>July 2016                            |                                                                    |                                         |
| <i>Osmia (Melanosmia) odontogaster gr.sp.1</i> |                     | June 2013                                         | June 2014                                                          |                                         |
| <i>Osmia (Melanosmia) odontogaster gr.sp.2</i> |                     | August 2014                                       | June 2016                                                          |                                         |
| <i>Osmia (Melanosmia) paradisica</i>           | Sandhouse, 1924     | August 2014<br>July-August 2015<br>June 2016      |                                                                    |                                         |

| <b>Species</b>                         | <b>Authorship</b> | <b>Dates Collected<br/>Park Co.</b>                   | <b>Dates Collected<br/>Lewis and Clark Co.</b>                    | <b>Dates Collected<br/>Flathead Co.</b> |
|----------------------------------------|-------------------|-------------------------------------------------------|-------------------------------------------------------------------|-----------------------------------------|
| <i>Osmia (Melanosmia) pentstemonis</i> | Cockerell, 1906   | June 2013<br>June-August 2014<br>June 2016            | July 2014                                                         |                                         |
| <i>Osmia (Melanosmia) phaceliae</i>    | Cockerell, 1907   | July 2014<br>June-July 2016                           | July 2014<br>June 2015<br>June 2016                               |                                         |
| <i>Osmia (Melanosmia) physariae</i>    | Cockerell, 1907   | June 2014                                             |                                                                   |                                         |
| <i>Osmia (Melanosmia) pikei</i>        | Cockerell, 1907   | June 2014                                             |                                                                   |                                         |
| <i>Osmia (Melanosmia) proxima</i>      | Cresson, 1864     | August 2014                                           |                                                                   |                                         |
| <i>Osmia (Melanosmia) pusilla</i>      | Cresson, 1864     | July-August 2014<br>August 2016                       | June 2013<br>June-August 2014<br>June 2015<br>June-July 2016      | July 2014                               |
| <i>Osmia (Melanosmia) sculleni</i>     | Sandhouse, 1939   | June 2014                                             |                                                                   |                                         |
| <i>Osmia (Melanosmia) simillima</i>    | Smith, 1853       |                                                       | June 2013<br>May-June 2014<br>June                                |                                         |
| <i>Osmia (Melanosmia) sp.3</i>         |                   |                                                       |                                                                   | July 2014                               |
| <i>Osmia (Melanosmia) sp.9</i>         |                   |                                                       | June 2013<br>June 2016                                            |                                         |
| <i>Osmia (Melanosmia) tersula</i>      | Cockerell, 1912   | June 2013<br>June-July 2014<br>June 2015<br>June 2016 | May 2016                                                          |                                         |
| <i>Osmia (Melanosmia) trevoris</i>     | Cockerell, 1897   |                                                       | June-July 2013<br>June-August 2014<br>June 2015<br>June-July 2016 |                                         |
| <i>Osmia (Melanosmia) tristella</i>    | Cockerell, 1897   | July 2014<br>July 2015<br>June 2016                   | June-July 2014<br>June 2015<br>June-July 2016                     | June-July 2014                          |



| <b>Species</b>                              | <b>Authorship</b> | <b>Dates Collected<br/>Park Co.</b> | <b>Dates Collected<br/>Lewis and Clark Co.</b>                    | <b>Dates Collected<br/>Flathead Co.</b> |
|---------------------------------------------|-------------------|-------------------------------------|-------------------------------------------------------------------|-----------------------------------------|
| <i>Osmia (Osmia) lignaria propinqua</i>     | Cresson, 1864     | July 2014<br>June 2016              | June 2015                                                         |                                         |
| <i>Stelis (Stelis) aff. permaculata</i>     | Cockerell, 1898   |                                     | July-August 2014                                                  |                                         |
| <i>Stelis (Stelis) calliphorina</i>         | (Cockerell, 1911) |                                     | July-August 2014<br>June-July 2015                                |                                         |
| <i>Stelis (Stelis) callura</i>              | Cockerell, 1925   |                                     | June 2014                                                         |                                         |
| <i>Stelis (Stelis) carnifex</i>             | Cockerell, 1911   | June 2015                           | June 2014                                                         |                                         |
| <i>Stelis (Stelis) foederalis gr.sp.2</i>   |                   | July 2016                           |                                                                   |                                         |
| <i>Stelis (Stelis) foederalis gr.sp.6</i>   |                   | July 2014                           | June 2015                                                         | July 2013                               |
| <i>Stelis (Stelis) foederalis gr.sp.7</i>   |                   | July 2016                           |                                                                   |                                         |
| <i>Stelis (Stelis) foederalis gr.sp.8</i>   |                   | August 2014                         |                                                                   |                                         |
| <i>Stelis (Stelis) montana</i>              | Cresson, 1864     | June-July 2013<br>July-August 2014  | June-July 2013<br>July-August 2014<br>June 2015<br>June-July 2016 | July 2013                               |
| <i>Stelis (Stelis) monticola</i>            | Cresson, 1878     | June 2015                           | June 2013<br>June 2014<br>June 2015                               |                                         |
| <i>Stelis (Stelis) nitida</i>               | Cresson, 1878     | July 2013                           |                                                                   |                                         |
| <i>Stelis (Stelis) permaculata</i>          | Cockerell, 1898   |                                     | July 2013<br>August 2014<br>July 2015                             |                                         |
| <b>Apidae</b>                               |                   |                                     |                                                                   |                                         |
| <i>Anthophora (Clisodon) terminalis</i>     | Cresson, 1869     | June 2015<br>July 2016              | July 2013<br>June-July 2014<br>June-July 2015<br>June-July 2016   |                                         |
| <i>Anthophora (Lophanthophora) pacifica</i> | Cresson, 1878     |                                     | June 2015                                                         |                                         |
| <i>Anthophora (Lophanthophora) ursina</i>   | Cresson, 1869     |                                     | June 2013<br>May-June 2014<br>June 2015<br>May-June 2016          |                                         |

| <b>Species</b>                               | <b>Authorship</b> | <b>Dates Collected<br/>Park Co.</b>                                        | <b>Dates Collected<br/>Lewis and Clark Co.</b>                       | <b>Dates Collected<br/>Flathead Co.</b>              |
|----------------------------------------------|-------------------|----------------------------------------------------------------------------|----------------------------------------------------------------------|------------------------------------------------------|
| <i>Anthophora (Melea) bomboidea</i>          | Kirby, 1838       |                                                                            | July 2014<br>June-July 2015<br>May-June 2016                         |                                                      |
| <i>Anthophora (Mystacanthophora) urbana</i>  | Cresson, 1878     |                                                                            | July 2013<br>July-August 2014<br>July 2016                           |                                                      |
| <i>Apis mellifera</i>                        | Linnaeus, 1758    | August 2014                                                                | June 2013<br>May-August 2014<br>June-July 2015<br>June 2016          |                                                      |
| <i>Bombus (Bombus) occidentalis</i>          | Greene, 1858      | July-August 2014<br>July-August 2016                                       |                                                                      | July 2013<br>July-August 2014                        |
| <i>Bombus (Cullumanobombus) griseocollis</i> | (De Geer, 1773)   |                                                                            | July 2013<br>August 2014<br>July-August 2015<br>July-August 2016     |                                                      |
| <i>Bombus (Cullumanobombus) rufocinctus</i>  | Cresson, 1863     | July 2013<br>July-August 2014<br>July-August 2015<br>July-August 2016      | July 2013<br>July-August 2014<br>June-August 2016                    | July 2013<br>July 2014                               |
| <i>Bombus (Psithyrus) flavidus</i>           | Eversmann, 1852   | July-August 2014<br>August 2016                                            |                                                                      | June-July 2013<br>July 2014                          |
| <i>Bombus (Psithyrus) insularis</i>          | (Smith, 1861)     | July-August 2014<br>July-August 2015<br>July-August 2016                   | August 2014<br>June-August 2015<br>July 2016                         | July 2013<br>July 2014                               |
| <i>Bombus (Psithyrus) suckleyi</i>           | Greene, 1860      |                                                                            |                                                                      | July 2013                                            |
| <i>Bombus (Pyrobombus) bifarius</i>          | Cresson, 1878     | June-July 2013<br>June-August 2014<br>June-August 2015<br>June-August 2016 | July 2013<br>June-August 2014<br>June-August 2015<br>May-August 2016 | June-July 2013<br>June-August 2014<br>June-July 2015 |

| <b>Species</b>                              | <b>Authorship</b> | <b>Dates Collected<br/>Park Co.</b>                                        | <b>Dates Collected<br/>Lewis and Clark Co.</b>                        | <b>Dates Collected<br/>Flathead Co.</b>       |
|---------------------------------------------|-------------------|----------------------------------------------------------------------------|-----------------------------------------------------------------------|-----------------------------------------------|
| <i>Bombus (Pyrobombus) centralis</i>        | Cresson, 1864     | June 2013<br>July-August 2014<br>July-August 2016                          | July 2013<br>June-August 2014<br>June-August 2015<br>June-August 2016 | July 2013<br>June-July 2014                   |
| <i>Bombus (Pyrobombus) flavifrons</i>       | Cresson, 1863     | June-July 2013<br>June-August 2014<br>June-August 2015<br>June-August 2016 | July 2013<br>June-August 2014<br>July 2015<br>June-August 2016        | July 2013<br>June-July 2014<br>June 2015      |
| <i>Bombus (Pyrobombus) huntii</i>           | Greene, 1860      | August 2014<br>August 2016                                                 | July 2013<br>July-August 2014<br>June-August 2015<br>June-August 2016 |                                               |
| <i>Bombus (Pyrobombus) melanopygus</i>      | Nylander, 1848    | July 2013<br>July-August 2014<br>July-August 2016                          | July 2016                                                             | June-July 2013<br>June-July 2014<br>July 2015 |
| <i>Bombus (Pyrobombus) mixtus</i>           | Cresson, 1878     | July 2013<br>June-August 2014<br>July 2015<br>July-August 2016             | July 2016                                                             | June-July 2013<br>June-July 2014<br>July 2015 |
| <i>Bombus (Pyrobombus) sitkensis</i>        | Nylander, 1848    |                                                                            |                                                                       | July 2013<br>June-July 2014<br>June-July 2015 |
| <i>Bombus (Pyrobombus) vagans</i>           | Smith, 1854       | August 2016                                                                |                                                                       | July 2013<br>July 2014                        |
| <i>Bombus (Subterraneobombus) appositus</i> | Cresson, 1878     | July-August 2014<br>August 2015<br>June-August 2016                        | July 2013<br>June-August 2014<br>July-August 2015<br>June-August 2016 | July 2013<br>July 2014                        |
| <i>Bombus (Subterraneobombus) borealis</i>  | Kirby, 1837       |                                                                            | August 2014<br>August 2016                                            |                                               |
| <i>Bombus (Thoracobombus) californicus</i>  | Smith, 1854       |                                                                            |                                                                       | July 2014                                     |

| <b>Species</b>                               | <b>Authorship</b> | <b>Dates Collected<br/>Park Co.</b> | <b>Dates Collected<br/>Lewis and Clark Co.</b>                         | <b>Dates Collected<br/>Flathead Co.</b> |
|----------------------------------------------|-------------------|-------------------------------------|------------------------------------------------------------------------|-----------------------------------------|
| <i>Bombus (Thoracobombus) fervidus</i>       | (Fabricius, 1798) | August 2014<br>August 2016          | July 2013<br>August 2014<br>June-August 2015<br>June-August 2016       |                                         |
| <i>Ceratina (Zadontomerus) nanula</i>        | Cockerell, 1897   | June-July 2014<br>June 2015         | June-July 2013<br>June-August 2014<br>June-July 2015<br>June-July 2016 | July 2014                               |
| <i>Ceratina (Zadontomerus) neomexicana</i>   | Cockerell, 1901   | June 2016                           | June-July 2013<br>May-August 2014<br>June-July 2015<br>May-August 2016 |                                         |
| <i>Diadasia (Coquillettapis) diminuta</i>    | (Cresson, 1878)   |                                     | June 2014                                                              |                                         |
| <i>Epeolus sp.</i>                           |                   |                                     | August 2014                                                            |                                         |
| <i>Eucera (Synhalonia) edwardsii</i>         | (Cresson, 1878)   | June 2016                           | June-July 2013<br>June-July 2014<br>June 2015<br>June 2016             |                                         |
| <i>Eucera (Synhalonia) frater</i>            | (Cresson, 1878)   | June 2016                           | June 2013<br>May-June 2014<br>June 2016                                |                                         |
| <i>Eucera (Synhalonia) fulvitaris</i>        | (Cresson, 1878)   |                                     | June 2013<br>June 2014<br>June 2016                                    |                                         |
| <i>Melecta (Melecta) pacifica fulvida</i>    | Cresson, 1878     |                                     | June 2014<br>June 2015                                                 |                                         |
| <i>Melecta (Melecta) separata</i>            | Cresson, 1879     |                                     | May 2014                                                               |                                         |
| <i>Melissodes (Eumelissodes) confusa</i>     | Cresson, 1878     |                                     | August 2014<br>August 2015                                             |                                         |
| <i>Melissodes (Eumelissodes) coreopsis</i>   | Robertson, 1905   |                                     | July 2014<br>August 2015<br>August 2016                                |                                         |
| <i>Melissodes (Eumelissodes) hymenoxidis</i> | Cockerell, 1906   |                                     | July 2014                                                              |                                         |

| <b>Species</b>                                | <b>Authorship</b> | <b>Dates Collected<br/>Park Co.</b> | <b>Dates Collected<br/>Lewis and Clark Co.</b>                 | <b>Dates Collected<br/>Flathead Co.</b> |
|-----------------------------------------------|-------------------|-------------------------------------|----------------------------------------------------------------|-----------------------------------------|
| <i>Melissodes (Eumelissodes) microstictus</i> | Cockerell, 1905   | August 2014<br>August 2016          | July 2013<br>July-August 2014<br>July 2015<br>June-August 2016 |                                         |
| <i>Melissodes (Eumelissodes) utahensis</i>    | LaBerge, 1961     |                                     | August 2014                                                    |                                         |
| <i>Melissodes (Heliomelissodes) rivalis</i>   | Cresson, 1872     |                                     | July 2014<br>July 2015<br>July 2016                            |                                         |
| <i>Melissodes</i> sp.F1                       |                   |                                     | August 2015                                                    |                                         |
| <i>Melissodes</i> sp.F2                       |                   |                                     | August 2016                                                    |                                         |
| <i>Melissodes</i> unk1                        |                   |                                     | August 2014                                                    |                                         |
| <i>Nomada edwardsii</i>                       | Cresson, 1878     |                                     | June 2013<br>May 2014<br>June 2015<br>June 2016                |                                         |
| <i>Nomada</i> sp.F1                           |                   |                                     | June 2014<br>June 2015<br>May 2016                             |                                         |
| <i>Nomada</i> sp.F2                           |                   |                                     | June 2014<br>June 2015<br>June 2016                            |                                         |
| <i>Nomada</i> sp.F3                           |                   | July 2014                           | June 2013<br>June-July 2014<br>June 2015<br>May 2016           |                                         |
| <i>Nomada</i> sp.F4                           |                   |                                     | June 2014                                                      |                                         |
| <i>Nomada</i> sp.F5                           |                   |                                     | June 2013                                                      |                                         |
| <i>Nomada</i> sp.F6                           |                   | July 2014                           |                                                                |                                         |
| <i>Nomada</i> sp.F7                           |                   |                                     | June 2013<br>May-June 2014                                     |                                         |
| <i>Nomada</i> sp.F8                           |                   |                                     |                                                                | July 2013                               |
| <i>Triepeolus paenepectoralis</i>             | Viereck, 1905     |                                     | August 2014                                                    |                                         |
